# Supplementary material for: Transcriptomic analysis of Bifidobacterium longum subsp. longum BBMN68 in response to oxidative shock
Source: PubMed Central journal article supplement (PMC6244367; doi:10.1038/s41598-018-35286-7), 2018-11-20
Supplement: 41598_2018_35286_MOESM1_ESM.pdf [file 41598_2018_35286_MOESM1_ESM.pdf]

1 **Supplemental information**

2 **Transcriptomic analysis of *Bifidobacterium longum* subsp. *longum* BBMN68 in response to**  
3 **oxidative shock**

4 Fanglei Zuo<sup>a,b,†</sup>, Rui Yu<sup>a,b</sup>, Man Xiao<sup>a,b</sup>, Gul Bahar Khaskheli<sup>a,b</sup>, Xiaofei Sun<sup>a</sup>, Huiqin Ma<sup>c</sup>, Fazheng Ren<sup>a</sup>,  
5 Bing Zhang<sup>d</sup>, Shangwu Chen<sup>a,b,\*</sup>

6 <sup>a</sup> *Beijing Advanced Innovation Center for Food Nutrition and Human Health, College of Food Science and*  
7 *Nutritional Engineering, China Agricultural University, Beijing 100083, P. R. China*

8 <sup>b</sup> *Department of Food Science and Engineering, College of Food Science and Nutritional Engineering,*  
9 *China Agricultural University, Beijing 100083, P. R. China*

10 <sup>c</sup> *College of Horticulture, China Agricultural University, Beijing 100193, P. R. China*

11 <sup>d</sup> *Core Genomic Facility, Beijing Institute of Genomics, Chinese Academy of Sciences, Beijing 100101, P. R.*  
12 *China*

13 <sup>†</sup> *Present address: Fanglei Zuo, Department of Molecular Biosciences, The Wenner-Gren Institute,*  
14 *Stockholm University, SE-10691 Stockholm, Sweden*

15 <sup>\*</sup> *Corresponding author, swchen@cau.edu.cn*

16 **Supplementary Table S1.** Fold change in expression of up- and downregulated genes of *B. longum*  
 17 BBMN68 under oxygen treatment.

| Changes in mRNA level<br>(30 min vs. control) | Number of genes (% of total) with indicated mRNA level change |                 |                  |              |
|-----------------------------------------------|---------------------------------------------------------------|-----------------|------------------|--------------|
|                                               | FC $\geq$ 2                                                   | 2 $\leq$ FC < 5 | 5 $\leq$ FC < 10 | FC $\geq$ 10 |
| Upregulated                                   | 241 (13.16)                                                   | 206 (11.25)     | 23 (1.26)        | 12 (0.66)    |
| Downregulated                                 | 99 (5.41)                                                     | 94 (5.13)       | 5 (0.27)         | 0 (0)        |
| Total                                         | 340 (18.57)                                                   | 300 (16.38)     | 28 (1.53)        | 12 (0.66)    |

  

| Changes in mRNA level<br>(60 min vs. control) | Number of genes (% of total) with indicated mRNA level change |                 |                  |              |
|-----------------------------------------------|---------------------------------------------------------------|-----------------|------------------|--------------|
|                                               | FC $\geq$ 2                                                   | 2 $\leq$ FC < 5 | 5 $\leq$ FC < 10 | FC $\geq$ 10 |
| Upregulated                                   | 217 (11.84)                                                   | 193 (10.53)     | 19 (1.04)        | 5 (0.27)     |
| Downregulated                                 | 218 (11.90)                                                   | 202 (11.03)     | 12 (0.66)        | 4 (0.22)     |
| Total                                         | 435 (23.74)                                                   | 395 (21.56)     | 31 (0.17)        | 9 (0.49)     |

18 FC: fold change.

19

20

21 **Supplementary Table S2.** Genes that were upregulated or downregulated by  $\geq$ 2-fold in the transcriptome  
 22 of *B. longum* BBMN68 exposed to 3% (v/v) oxygen (see Excel file).

23 **Supplementary Figure S1.** Growth of *B. longum* BBM68 under modified MRS broth supplemented with  
24  $\text{MnSO}_4$  (at 0 to 1000  $\mu\text{M}$ ). *B. longum* BBM68 overnight culture was inoculated at 1% into an injection  
25 vial containing modified MRS broth and grown upon exposure to 3% (v/v) oxygen (A) or under anaerobic  
26 conditions (B).

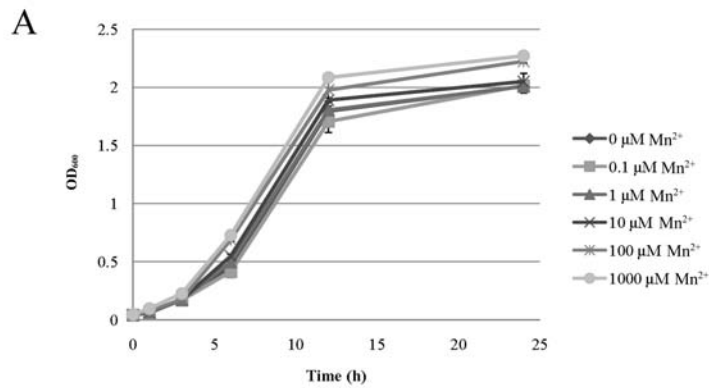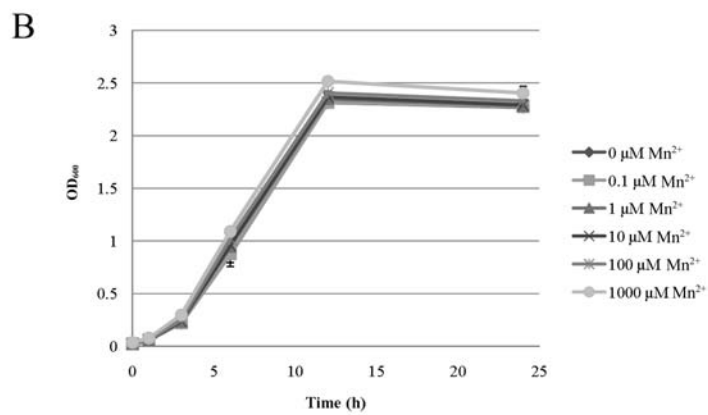

27

28 **Supplementary Figure S2.** Global transcriptome profile of carbohydrate metabolism (adapted from KEGG  
 29 pathway blb00010, blb00020, blb00030, and blb00052)<sup>49</sup> of *B. longum* BBMN68 exposed to 3% (v/v)  
 30 oxygen. The gene designation and enzyme code are shown in and adjacent to the boxes, respectively. The  
 31 small colored squares adjacent to genes indicate increased expression fold change for 3% oxygen for 30  
 32 min treatment vs. control (left), and 3% oxygen for 60 min treatment vs. control (right). Square colors  
 33 indicate the extent of the fold changes according to color key at bottom left.

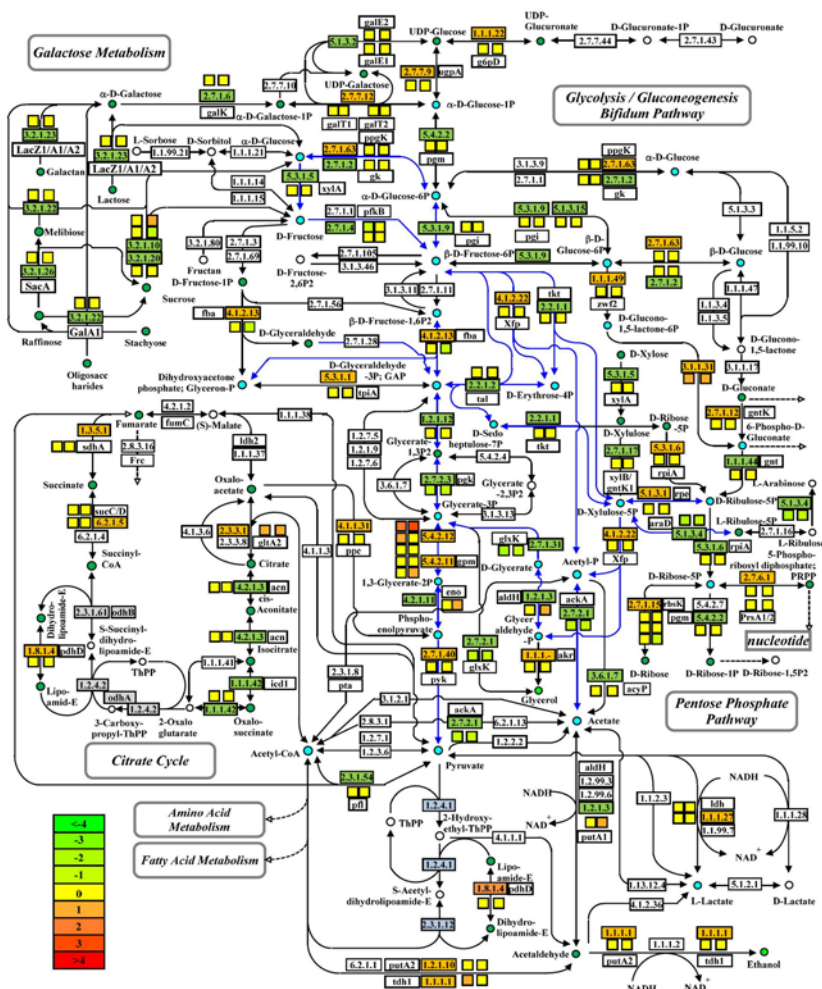

34

35 **Supplementary Figure S3.** Genes involved in branched-chain amino acid (BCAA) synthesis (adapted  
 36 from KEGG pathway blb00290)<sup>49</sup> were upregulated in *B. longum* BBM68 upon exposure to 3% (v/v)  
 37 oxygen. Gene name and enzyme code are shown. The small colored squares adjacent to genes indicate  
 38 increased (red) or non-significantly increased (yellow) mRNA expression for 3% oxygen treatment for 30  
 39 min vs. control (left), and 3% oxygen treatment for 60 min vs. control (right).

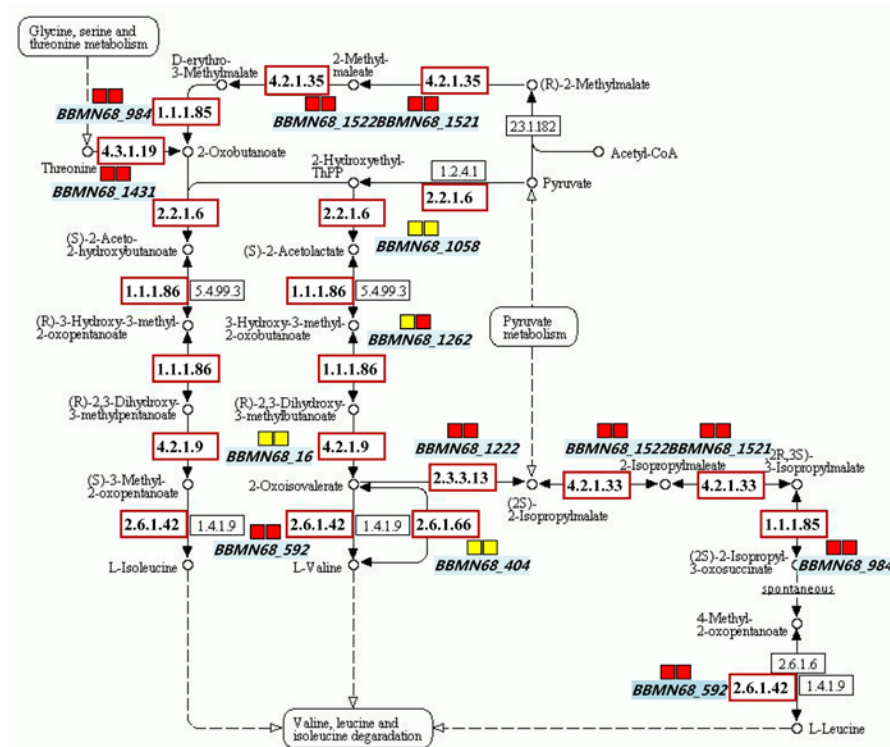

40

41 **Supplementary Figure S4.** Genes involved in tetrahydrofolate (THF) synthesis (adapted from KEGG  
 42 pathway blb00790)<sup>49</sup> were upregulated in *B. longum* BBMN68 upon exposure to 3% (v/v) oxygen. Red  
 43 gene names indicate upregulation in BBMN68 exposed to 3% oxygen for 60 min vs. control.

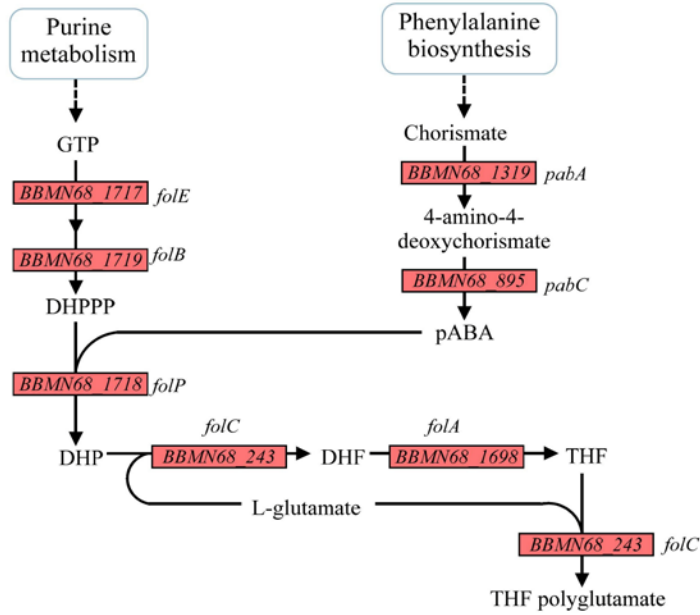

44  
 45  
 46  
 47  
 48  
 49  
 50  
 51  
 52  
 53  
 54  
 55  
 56  
 57  
 58

59 **Reference**

- 60 49. Kanehisa, M. & Goto, S. KEGG: Kyoto Encyclopedia of Genes and Genomes. *Nucleic Acids Res.* **28**,  
61 27-30 (2000).
